# Supplementary material
Source: Springer Nature journal article supplement (https://www.springermedizin.de/resource/supplementary/12889_2010_3148_MOESM3_ESM.pdf/9488114)
Supplement: MOESM3 [file 9488114]

Contacted by phone and invited to participate ( $n=296$ )

Iraqi: ♂  $n=65$ , ♀  $n=62$

Swedish: ♂  $n=97$ , ♀  $n=72$

Severely ill ( $n=2$ )

Iraqi: ♂  $n=1$ , ♀  $n=0$

Swedish: ♂  $n=0$ , ♀  $n=1$

Eligible study population ( $n=294$ )

Iraqi: ♂  $n=64$ , ♀  $n=62$

Swedish: ♂  $n=97$ , ♀  $n=71$

Agreed to participate ( $n=194$ )

Iraqi: ♂  $n=56$ , ♀  $n=51$

Swedish: ♂  $n=45$ , ♀  $n=42$

Drop-outs ( $n=19$ )

Iraqi: ♂  $n=5$ , ♀  $n=6$

Swedish: ♂  $n=1$ , ♀  $n=7$

Physical examination, blood samples and questionnaires ( $n=175$ )

Iraqi: ♂  $n=51$ , ♀  $n=45$

Swedish: ♂  $n=44$ , ♀  $n=35$

Participation rate:

Iraqi: ♂ 79%, ♀ 72%

Swedish: ♂ 45%, ♀ 49%
